# Supplementary material
Source: publisher figshare collection journal article supplement (https://acs.figshare.com/ndownloader/files/15126899)

## Supplementary Informations

### 1. Journal name

Energy & Fuels

### 2. Manuscript Title

Variations in microbiota communities with the ranks of coals from three Permian mining areas predictive energy metabolic functions in mine tailings profiles

### 3. Author names

Bingjun Liu,<sup>1,2</sup> Liang Yuan, \*,<sup>1</sup> Xianyang Shi,<sup>1</sup> Yang Li,<sup>1</sup> Chunlu Jiang,<sup>1</sup> Bo Ren<sup>2</sup>, Qingye Sun<sup>1</sup>

### 4. Author affiliations

<sup>1</sup>School of Resources and Environmental Engineering, Anhui University, Hefei, Anhui 230601, People's Republic of China

<sup>2</sup>Coal Mining National Engineering Technology Research Institute, Huainan, Anhui 232000, People's Republic of China

### 5. Corresponding author\*

Prof. Liang Yuan

### 6. The e-mail address, telephone and fax numbers of the corresponding author

E-mail: [sunqingye@ahu.edu.cn](mailto:sunqingye@ahu.edu.cn); Tel: +86-554-2168093

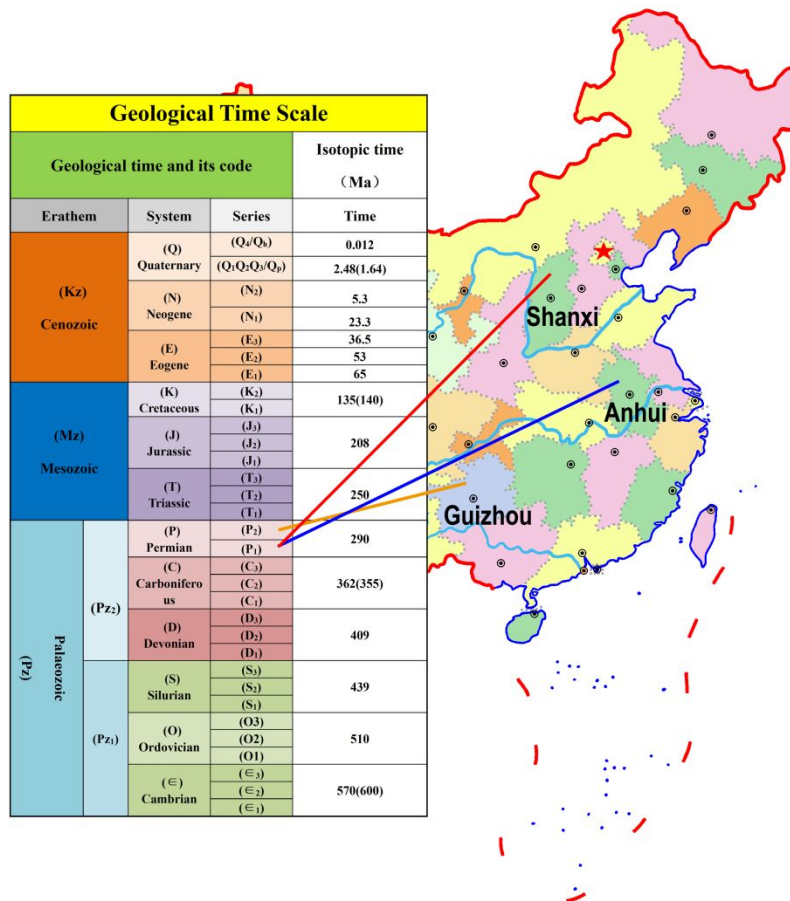

Figure S1. Three sampling areas and corresponding stratigraphic ages.

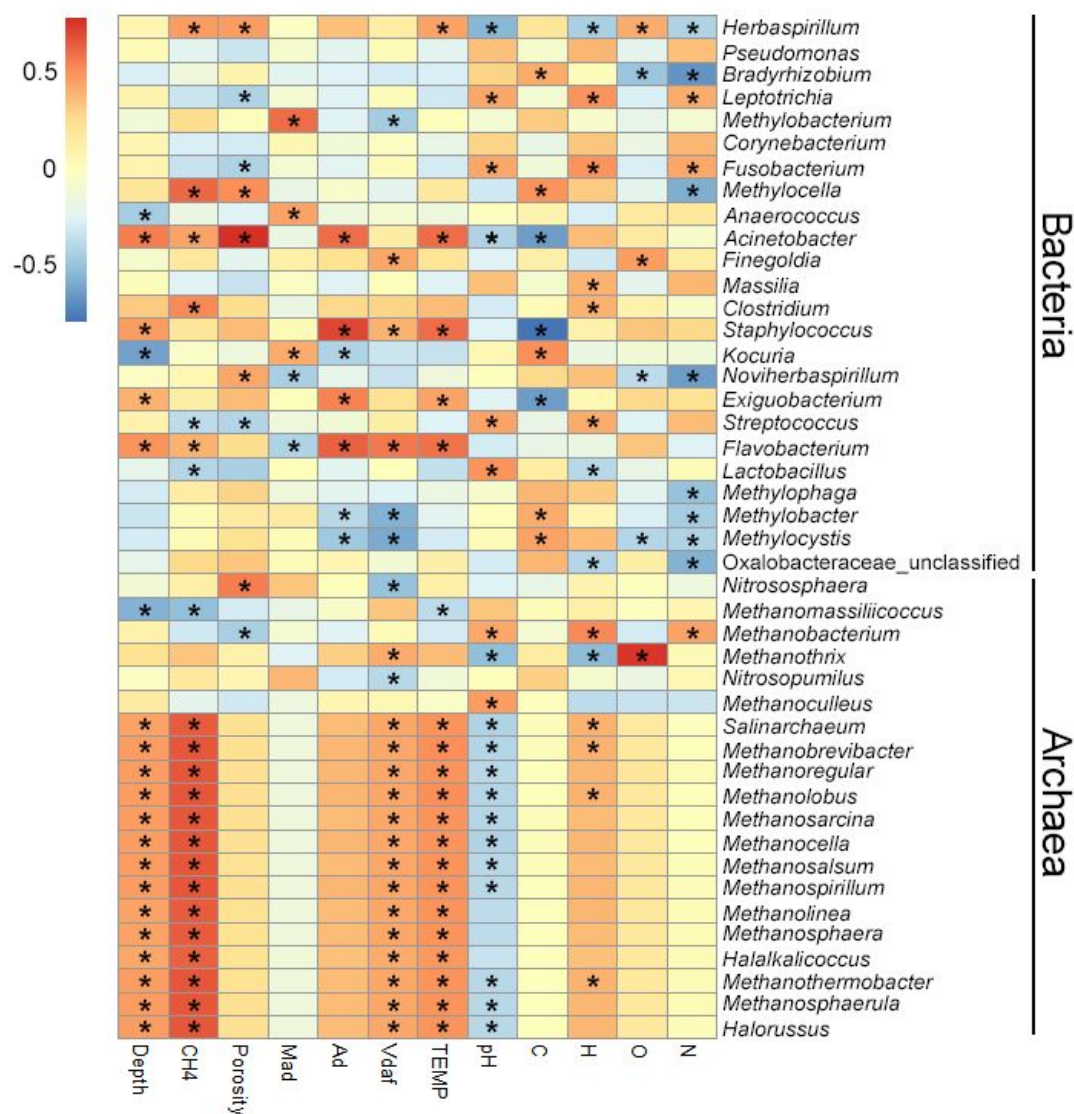

Supplement: Supplementary file 1 [file 15126899]
